# Supplementary material for: Phosphorylation of Rab-coupling protein by LMTK3 controls Rab14-dependent EphA2 trafficking to promote cell:cell repulsion
Source: PubMed Central journal article supplement (PMC5355957; doi:10.1038/ncomms14646), 2017-03-15
Supplement: ncomms14646-s8.pdf [file ncomms14646-s8.pdf]

1 **Editorial Note:** this manuscript has been previously reviewed at another journal that is not operating  
2 a transparent peer review scheme. This document only contains reviewer comments and rebuttal  
3 letters for versions considered at Nature Communications.  
4
